# Supplementary material
Source: publisher figshare collection journal article supplement (https://acs.figshare.com/ndownloader/files/4607740)

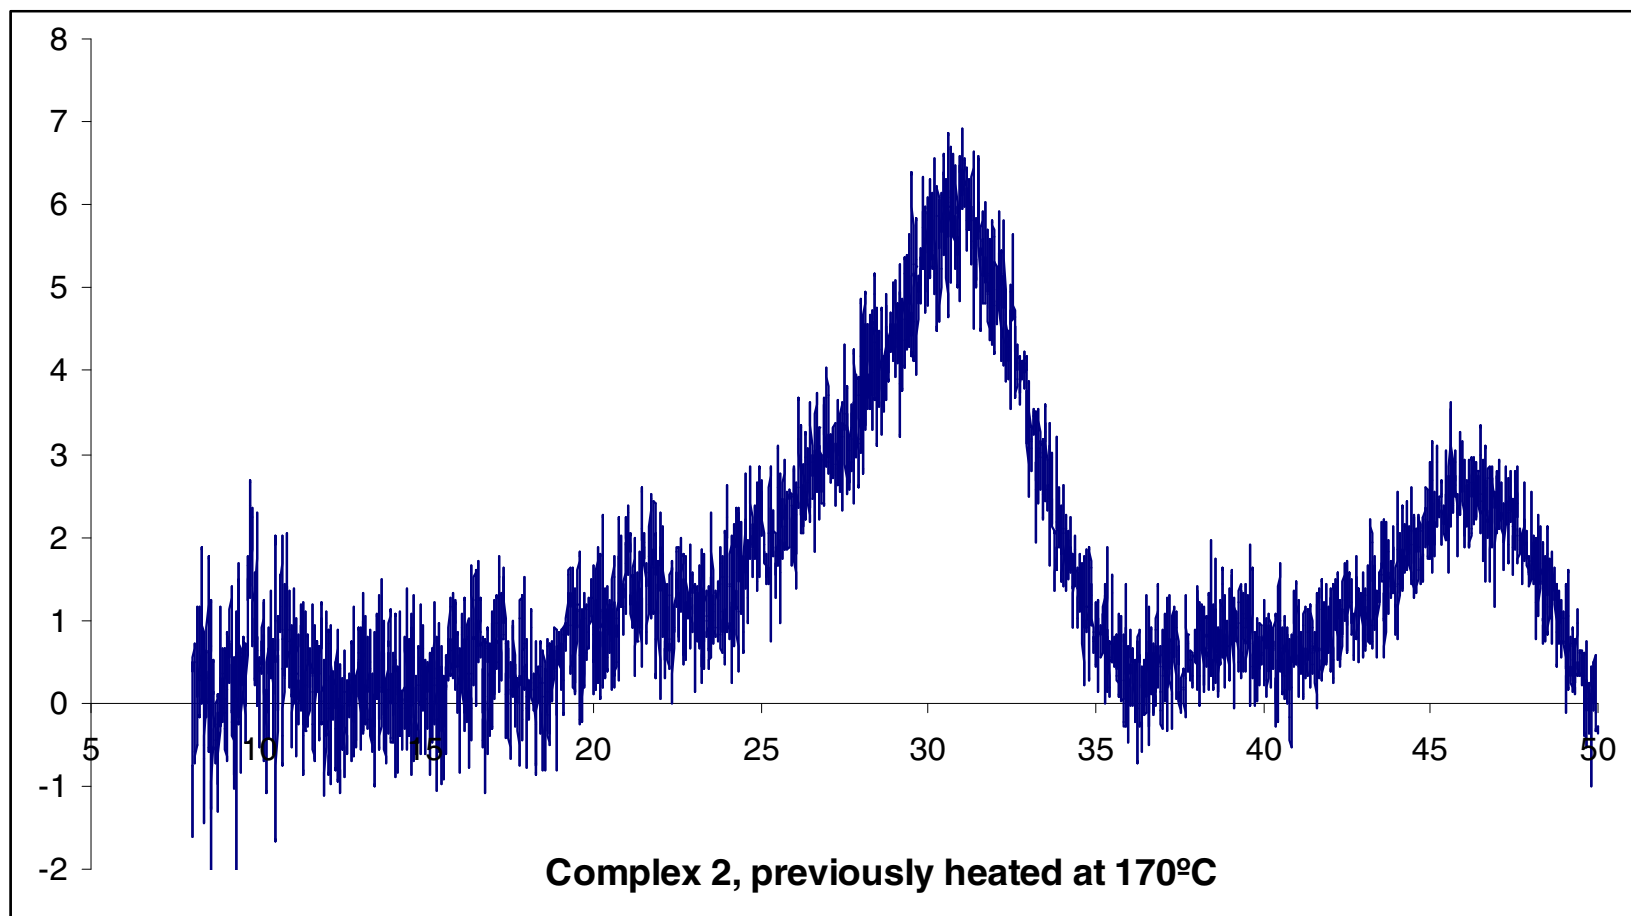

Figure S4: Powder diffractogram for complex 2 after heating at 170°C

Supplement: Supplementary file 1 [file 4607740]
